# Supplementary material for: A novel single-chain antibody redirects adenovirus to IL13Rα2-expressing brain tumors
Source: PubMed Central journal article supplement (PMC4677343; doi:10.1038/srep18133), 2015-12-14
Supplement: srep18133-s1.pdf [file srep18133-s1.pdf]

## Supplementary Information

### **A novel single-chain antibody redirects adenovirus to IL13R $\alpha$ 2-expressing brain tumors.**

Julius W. Kim, Jacob S. Young, Elena Solomaha, Deepak Kanojia, Maciej S. Lesniak, Irina V. Balyasnikova.

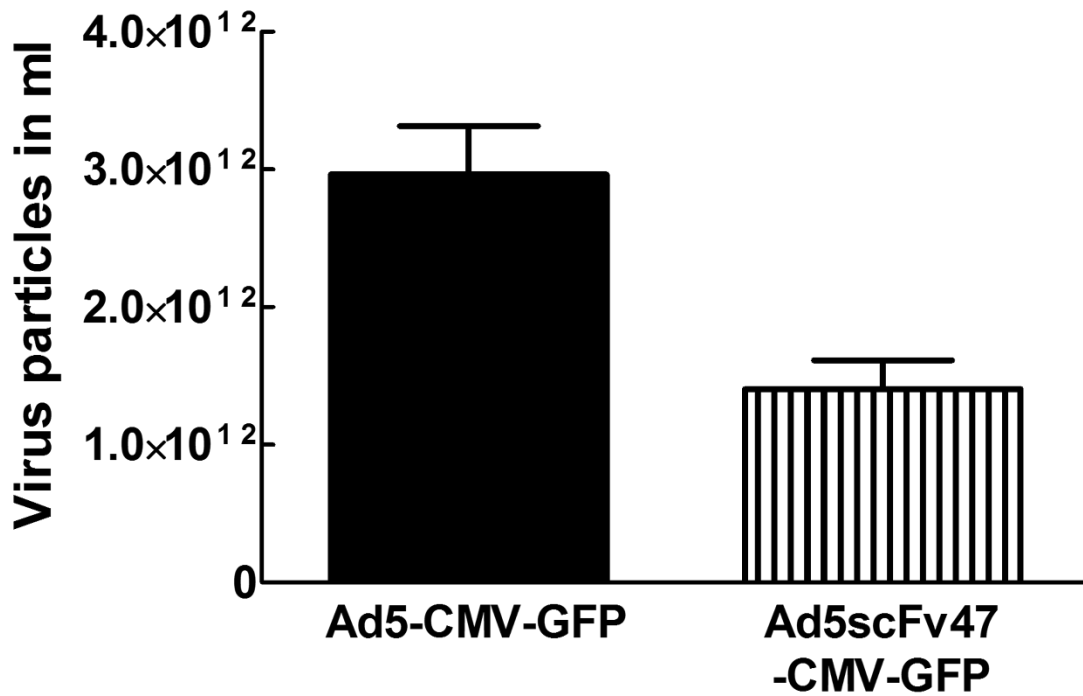

**Supplementary Figure 1. The efficiency of Ad5FFscFv47-CMV-GFP viral production.** Both Ad5-CMV-GFP and Ad5FFscFv47-CMV-GFP were propagated, purified and titrated as described in the Material and Method section. Each data point is an average of 3 independent replicates. Mean  $\pm$  SEM is plotted.

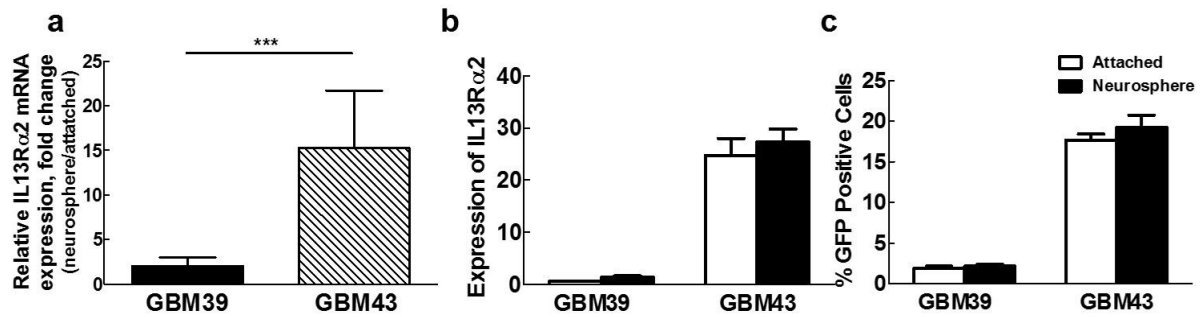

**Supplementary Figure 2. Infection of primary GBM cells by Ad5FFscFv47-CMV-GFP virus.** **A.** Relative IL13R $\alpha$ 2 mRNA expression in patient derived primary GBM39 and GBM43 cells grown as adherent or neurosphere cultures was analyzed by qRT-PCR. The level of IL13R $\alpha$ 2 mRNA expression was normalized to GAPDH mRNA expression. **B.** Comparison of IL13R $\alpha$ 2 expression on the surface of the primary GBM cells grown as an adherent culture or as neurospheres. **C.** Ad5FFscFv47-CMV-GFP infectivity of the primary GBM cells grown as adherent or neurospheres cultures determined by flow cytometry analysis for GFP-positive cells. Each data point is an average of 3 independent replicates. Mean  $\pm$  SEM is plotted. \*\*\*  $P < 0.001$ .

**Supplementary Table 1. Primer sets used for amplification of variable regions of antibody<sup>a</sup>.**

|            | <b>Heavy chain</b>                                 | <b>Light kappa chain</b>    |
|------------|----------------------------------------------------|-----------------------------|
| Forward 1  | 5'-GATGTGAAGCTTCAGGAGTC-3'                         | 5'-GATGTTTTGATGACCCAAACT-3' |
| Forward 2  | 5'-CAGGTGCAGCTGAAGGAGTC-3'                         | 5'-GATATTGTGATGACGCAGGCT-3' |
| Forward 3  | 5'-CAGGTGCAGCTGAAGCAGTC-3'                         | 5'-GATATTGTGATAACCCAG-3'    |
| Forward 4  | 5'-CAGGTACTCTGAAAGAGTC-3'                          | 5'-GACATTGTGCTGACCCAATCT-3' |
| Forward 5  | 5'-GAGGTCCAGCTGCAACAATCT-3'                        | 5'-GACATTGTGATGACCCAGTCT-3' |
| Forward 6  | 5'-GAGGTCCAGCTGCAGCAGTC-3'                         | 5'-GATATTGTGCTAACTCAGTCT-3' |
| Forward 7  | 5'-CAGGTCCAACCTGCAGCAGCCT-3'                       | 5'-GATATCCAGATGACACAGACT-3' |
| Forward 8  | 5'-GAGGTGAAGCTGGTGGAGTC-3'                         | 5'-GACATCCAGCTGACTCAGTCT-3' |
| Forward 9  | 5'-GAGGTGAAGCTGGTGAATC-3'                          | 5'-CAAATTGTTCTCACCCAGTCT-3' |
| Forward 10 | 5'-GATGTGAACTTGAAGTGTC-3'                          | 5'-GACATTCTGATGACCCAGTCT-3' |
| Forward 11 | 5'-GAGGTGCAGCTGGAGGAGTC-3'                         | n/a                         |
| Reverse    | 5'-<br>GGCCAGTGGATAGTCAGATGGGGGT<br>GTCGTTTTGGC-3' | 5'-GGATACAGTTGGTGCAGCATC-3' |

<sup>a</sup> Sequences of primer sets were previously published<sup>25</sup>
